# Supplementary material for: Dual color triads: synthesis, photophysics and applications in live cell imaging
Source: Royal Society of Chemistry journal article supplement (doi:10.1039/d1nj00900a), 2021-01-01
Supplement: d1nj00900a1.pdf [file d1nj00900a1.pdf]

**SUPPORTING INFORMATION**

**Dual Color Triads: Synthesis, Photophysics And Application in Live  
Cell Imaging**

*Esra Tanrıverdi Eçik\*, Emrah Özcan, H.Hüseyin Kazan, İsmail Erol, Elif Şenkuytu,  
Bünyemin Çoşut*

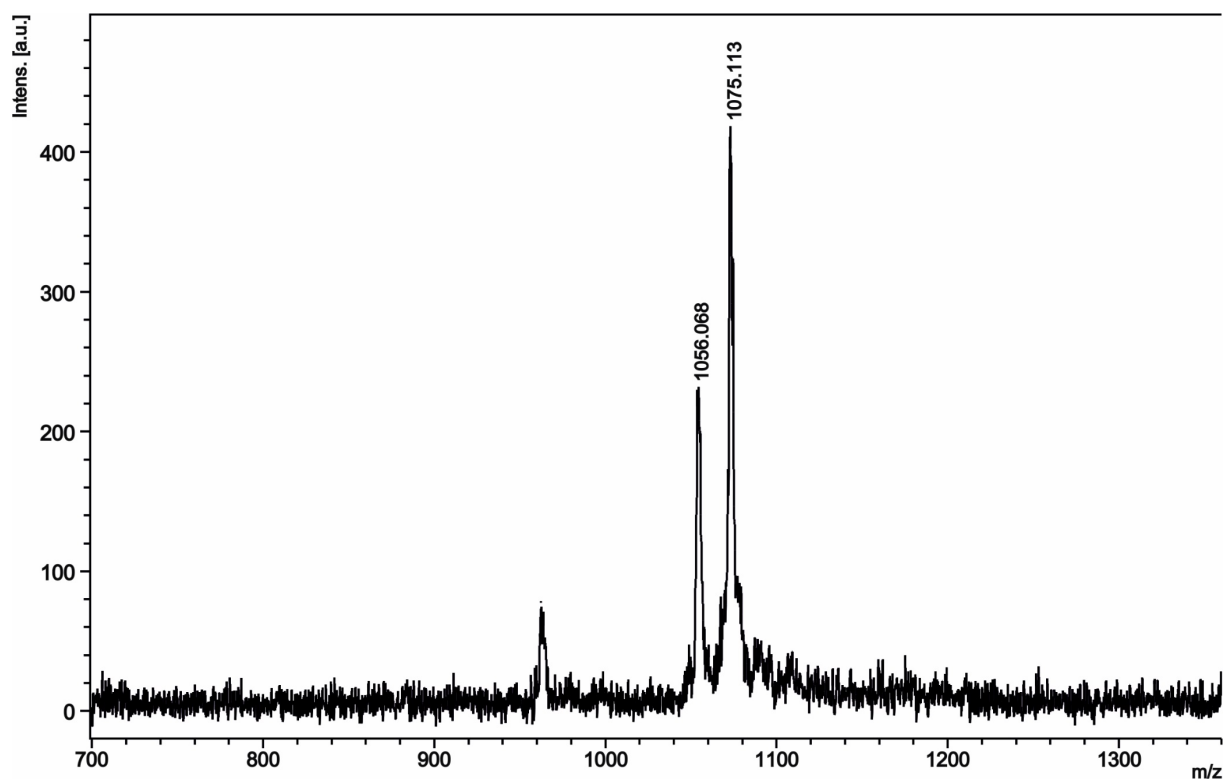

**Figure S1.** Mass spectrum of compound **5**.

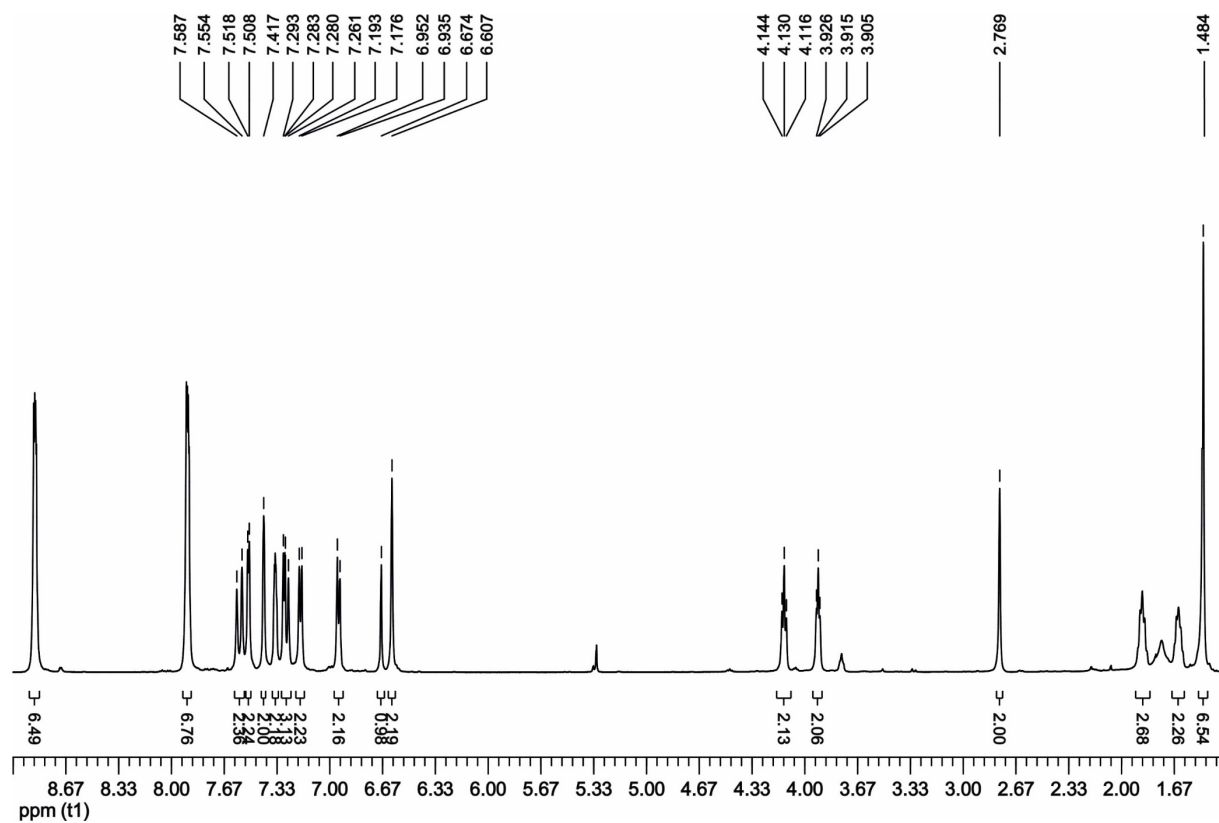

Figure S2.  $^1\text{H}$  NMR spectrum of compound **5**

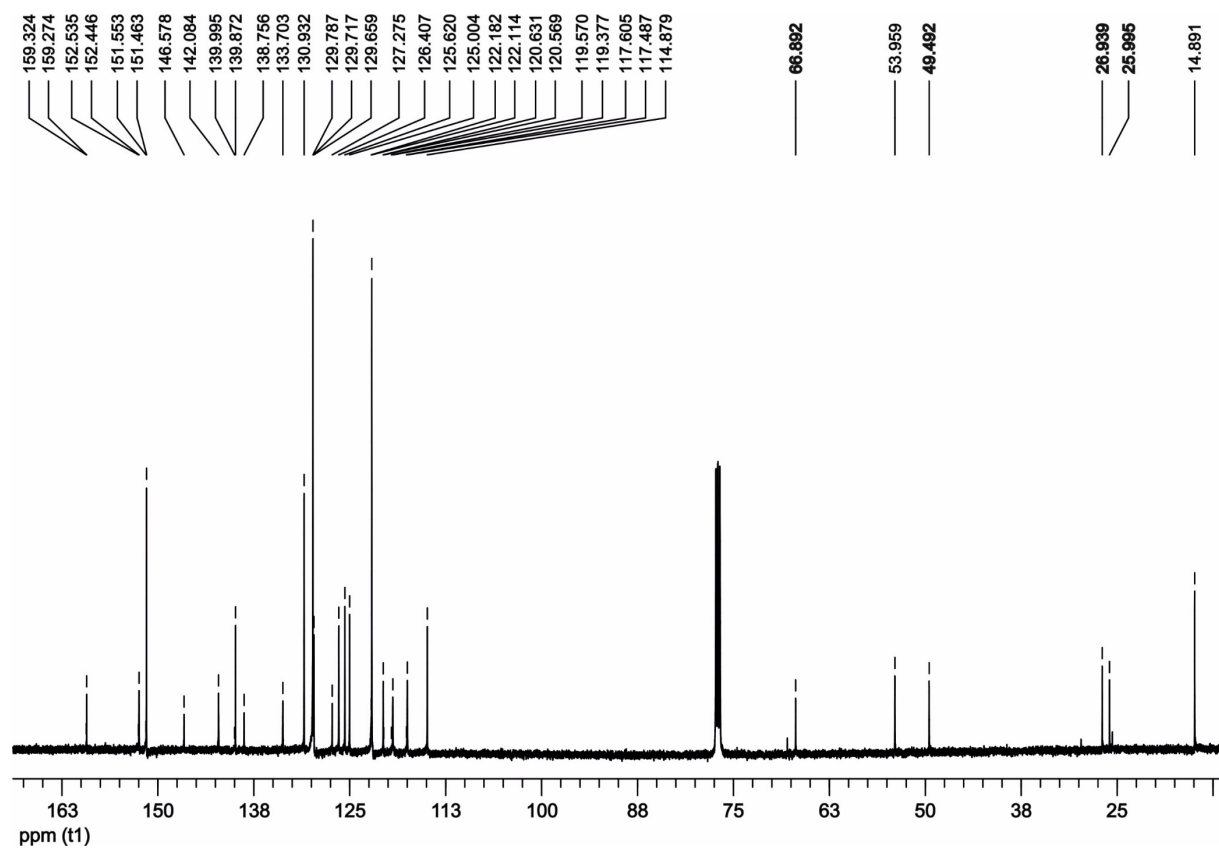

Figure S3.  $^{13}\text{C}$  NMR spectrum of compound **5**

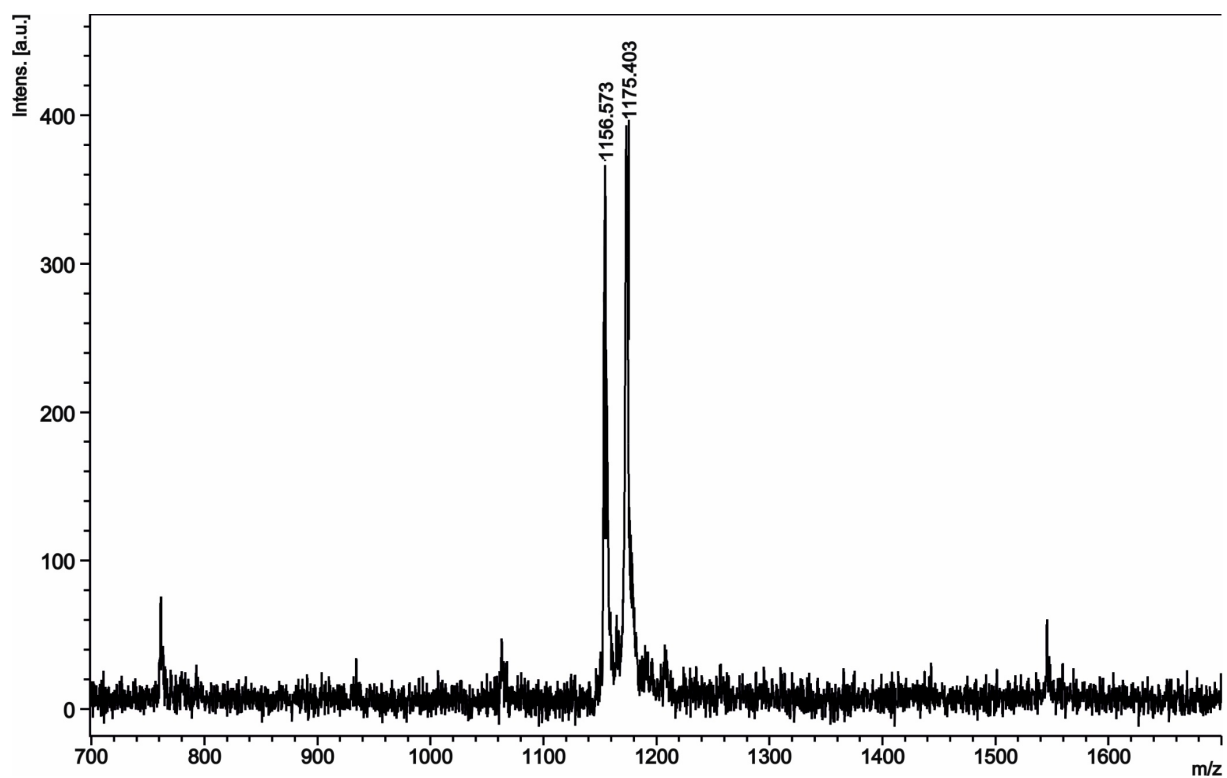

Figure S4. Mass spectrum of compound 6.

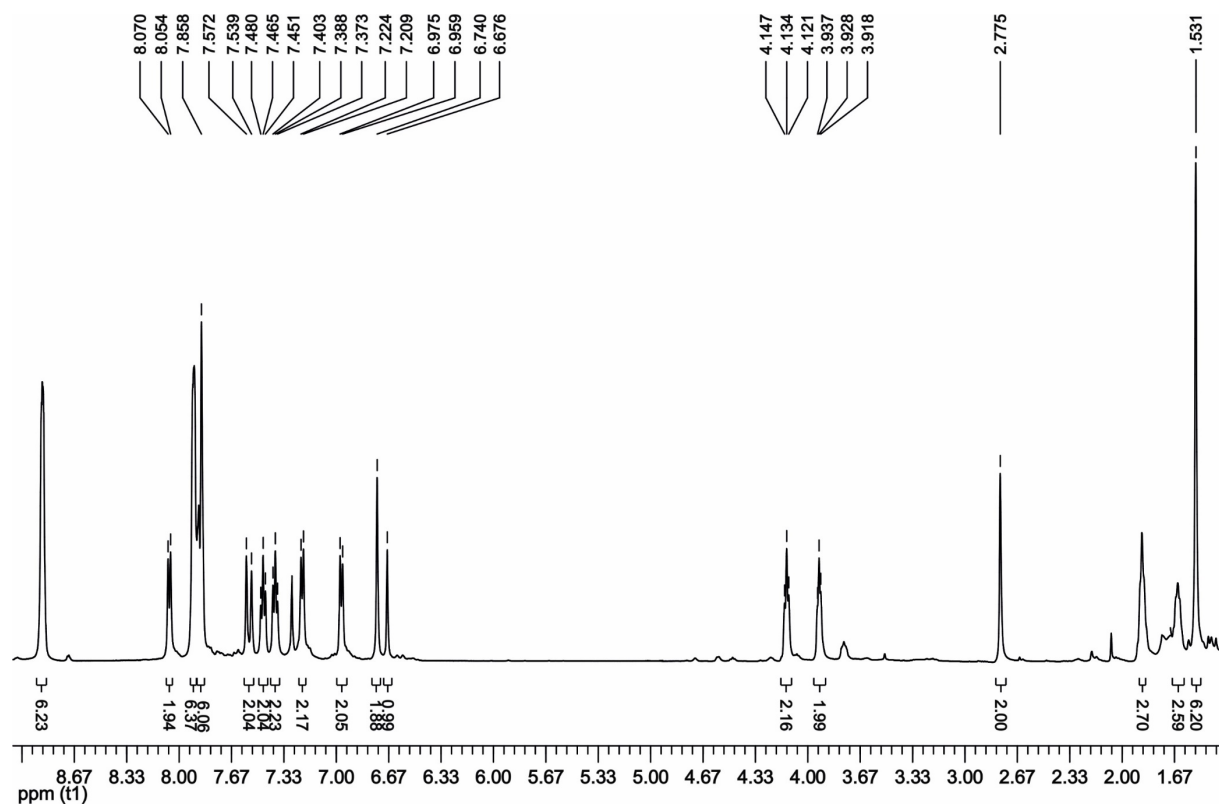

Figure S5. <sup>1</sup>H NMR spectrum of compound 6

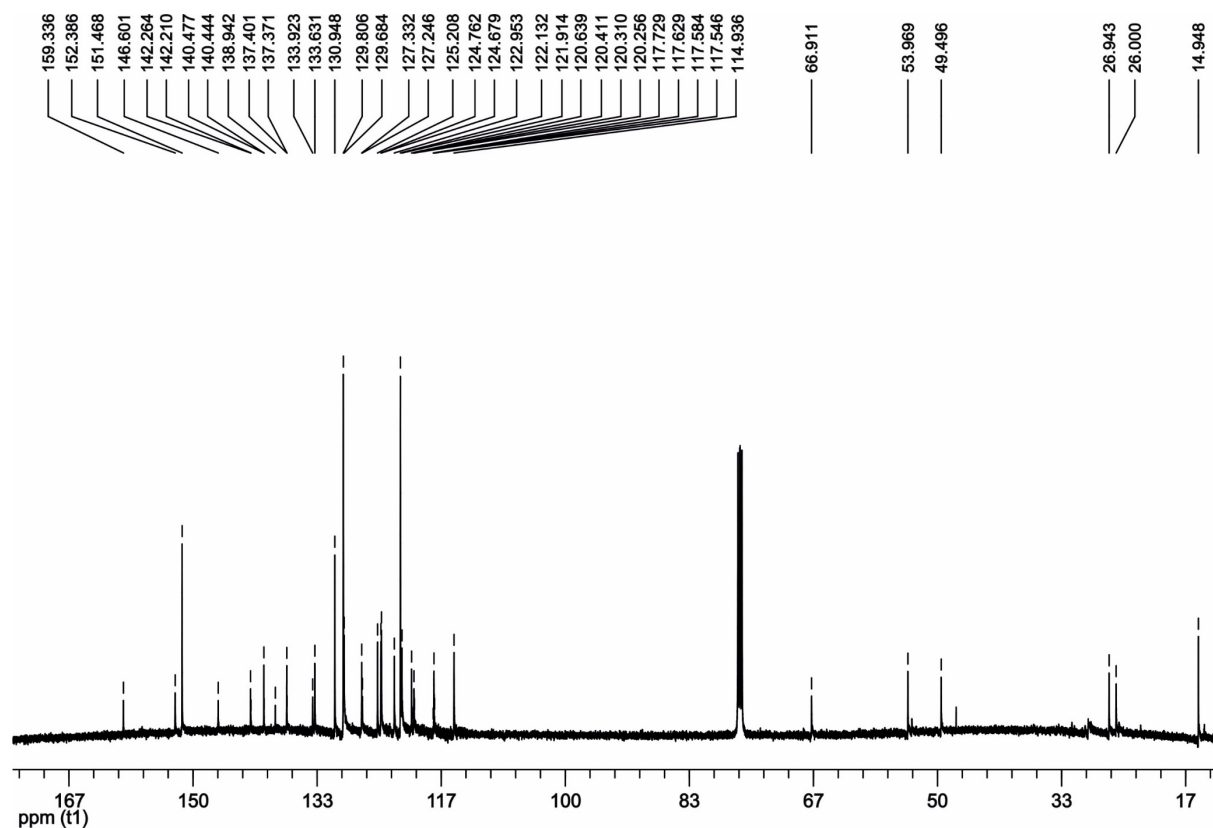

**Figure S6.**  $^{13}\text{C}$  NMR spectrum of compound **6**

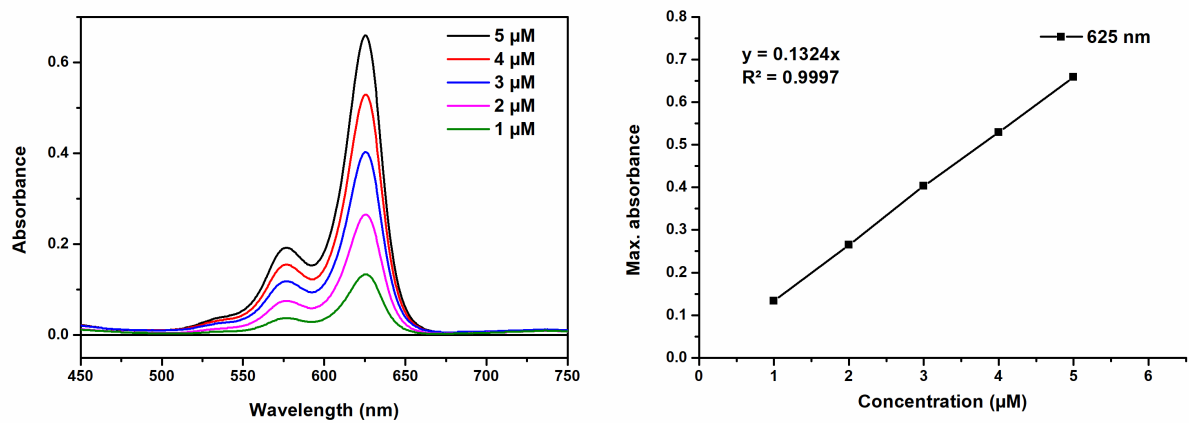

**Figure S7.** Absorbance spectrum of compound **2** in THF/Water (1:1) at different concentration

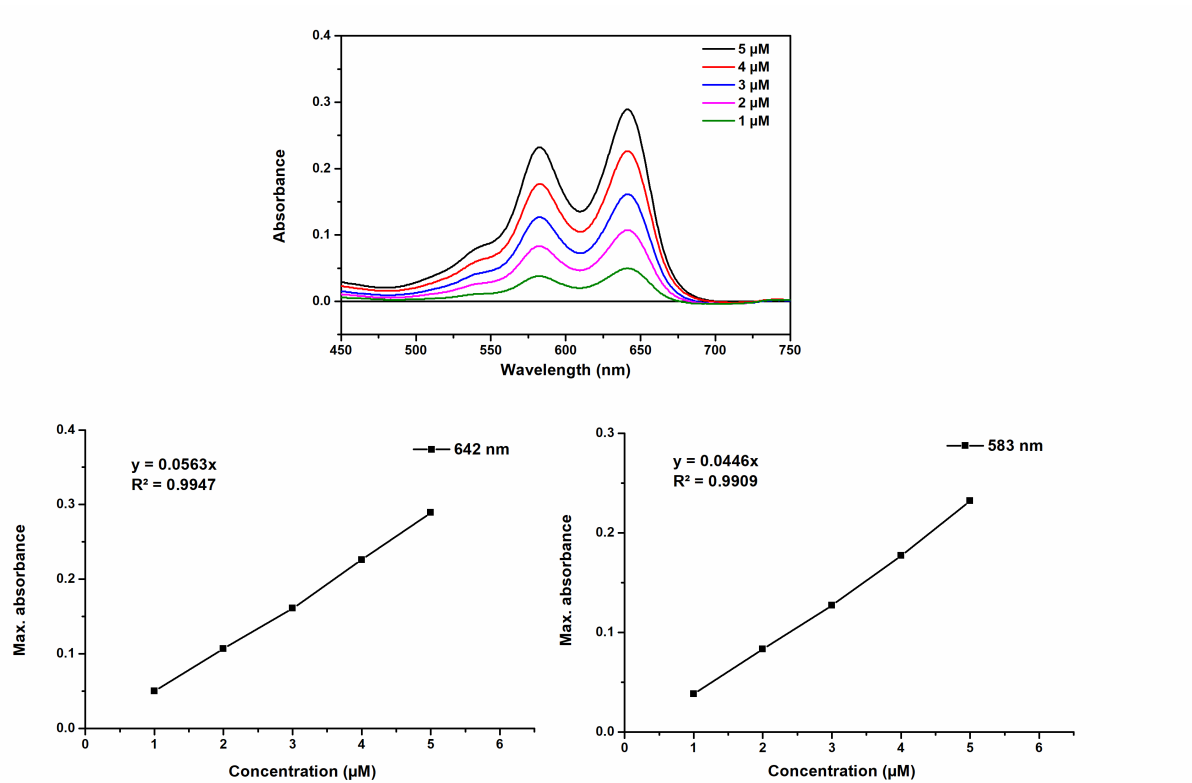

**Figure S8.** Absorbance spectrum of compound 3 in THF/Water (1:1) at different concentration

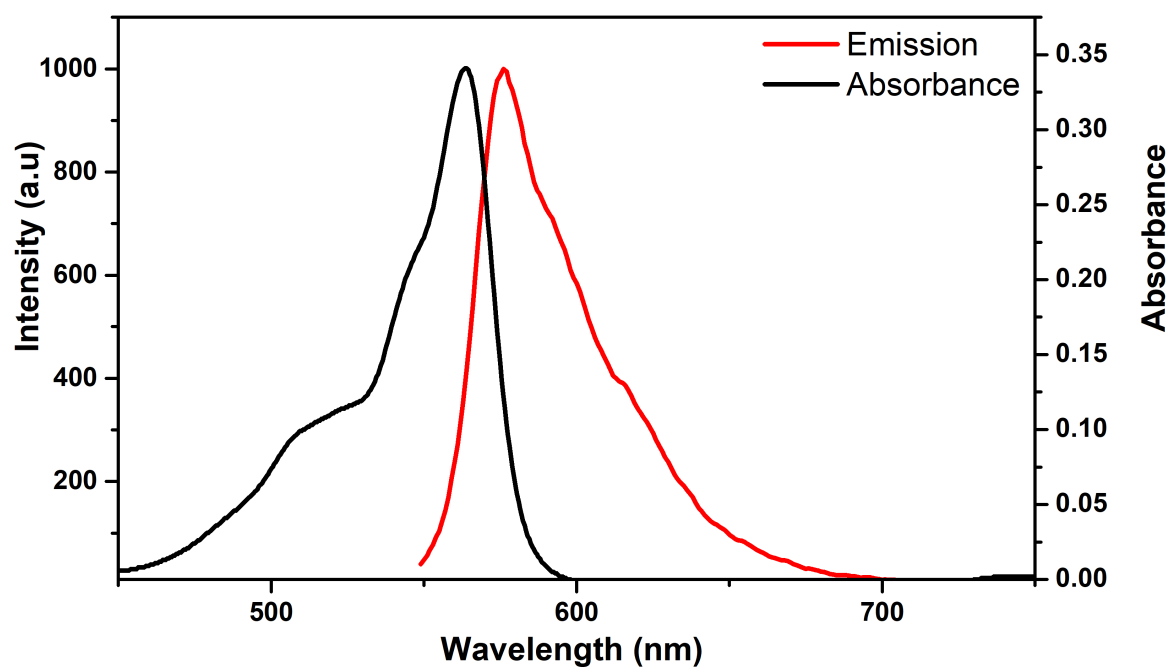

**Figure S9.** Absorbance and emission spectra of the compound **4** (5.0  $\mu\text{M}$ ) in THF/water (1:1).

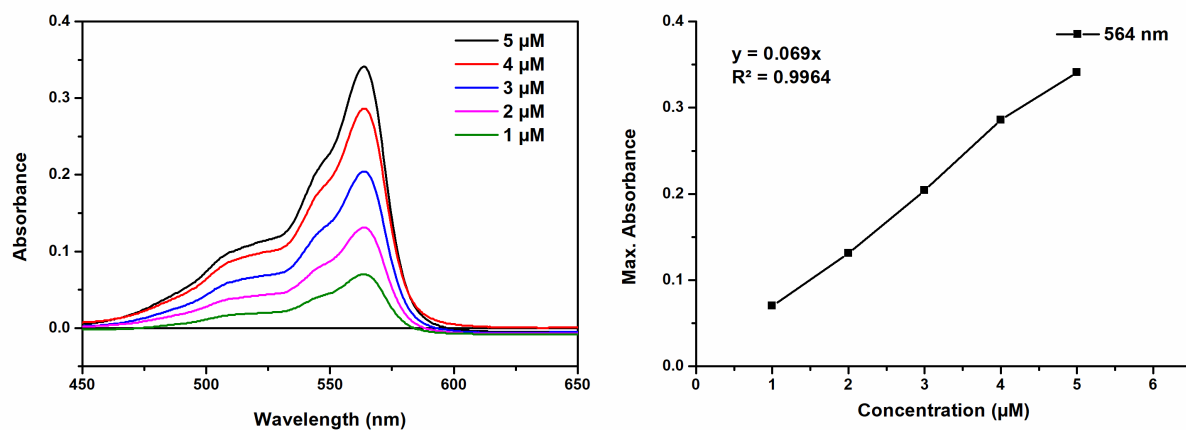

**Figure S10.** Absorbance spectrum of compound **4** in THF/Water (1:1) at different concentration

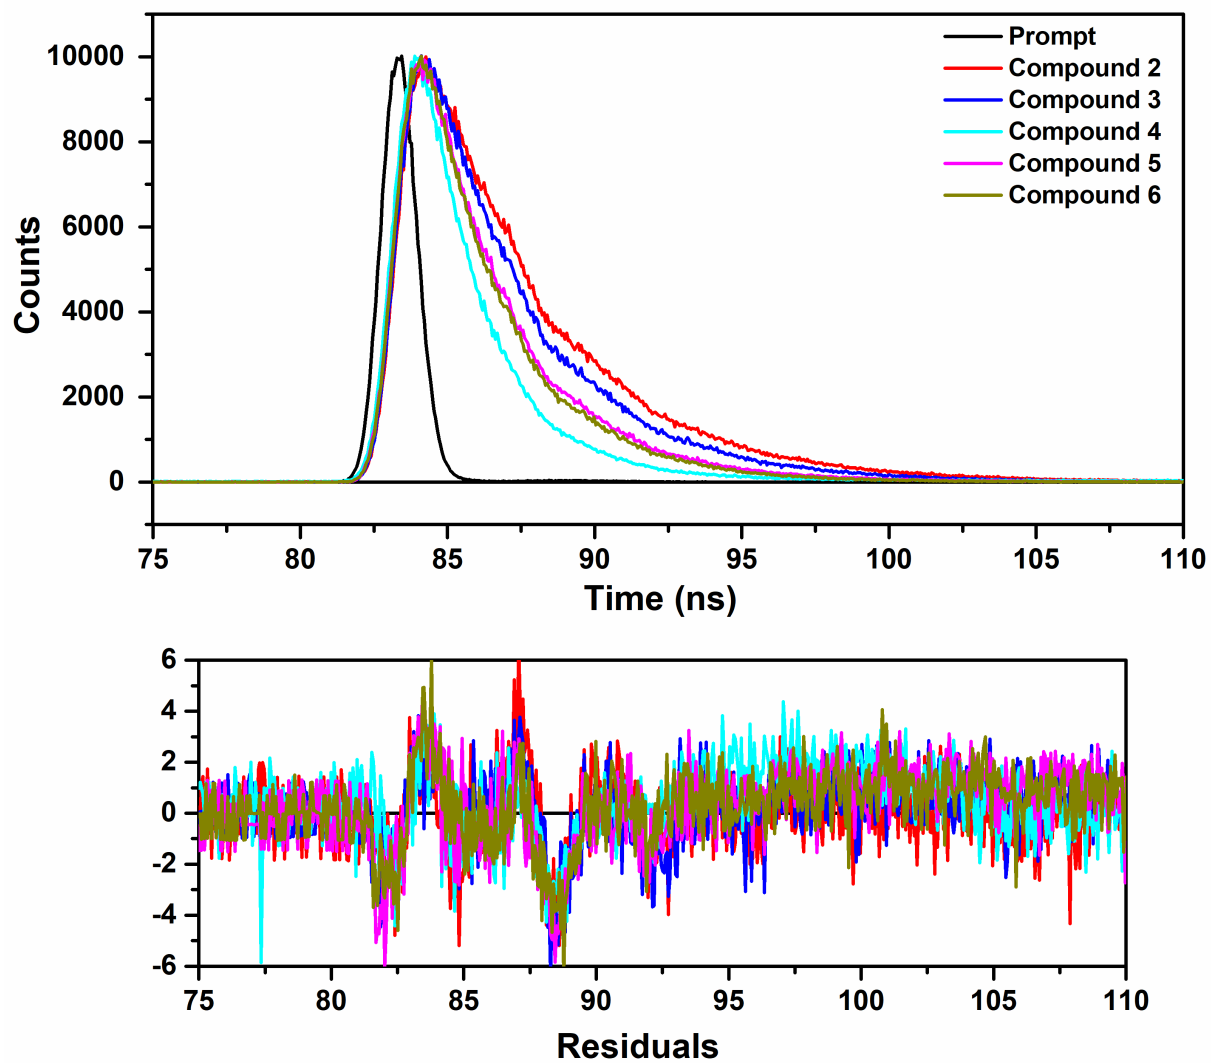

**Figure S11.** Fluorescence decay profiles of compound 2-6 in the presence using laser excitation source of 674 nm.



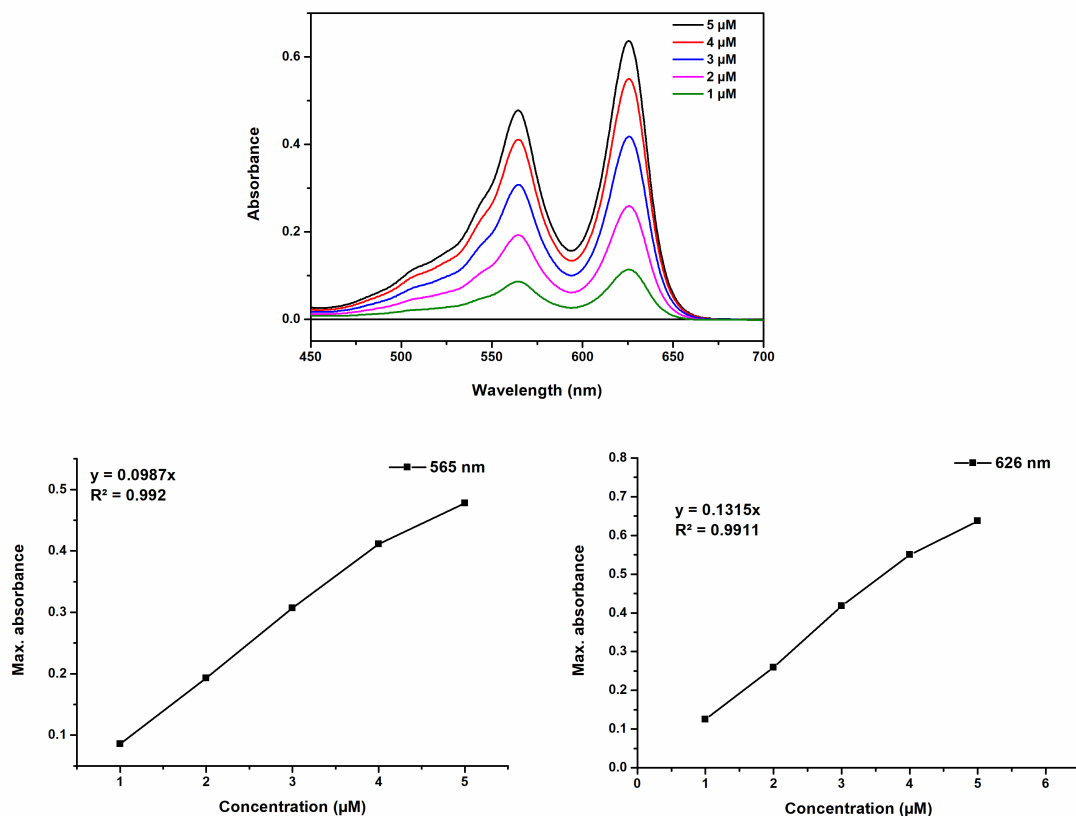

**Figure S12.** Absorbance spectrum of compound **5** in THF/Water (1:1) at different concentration

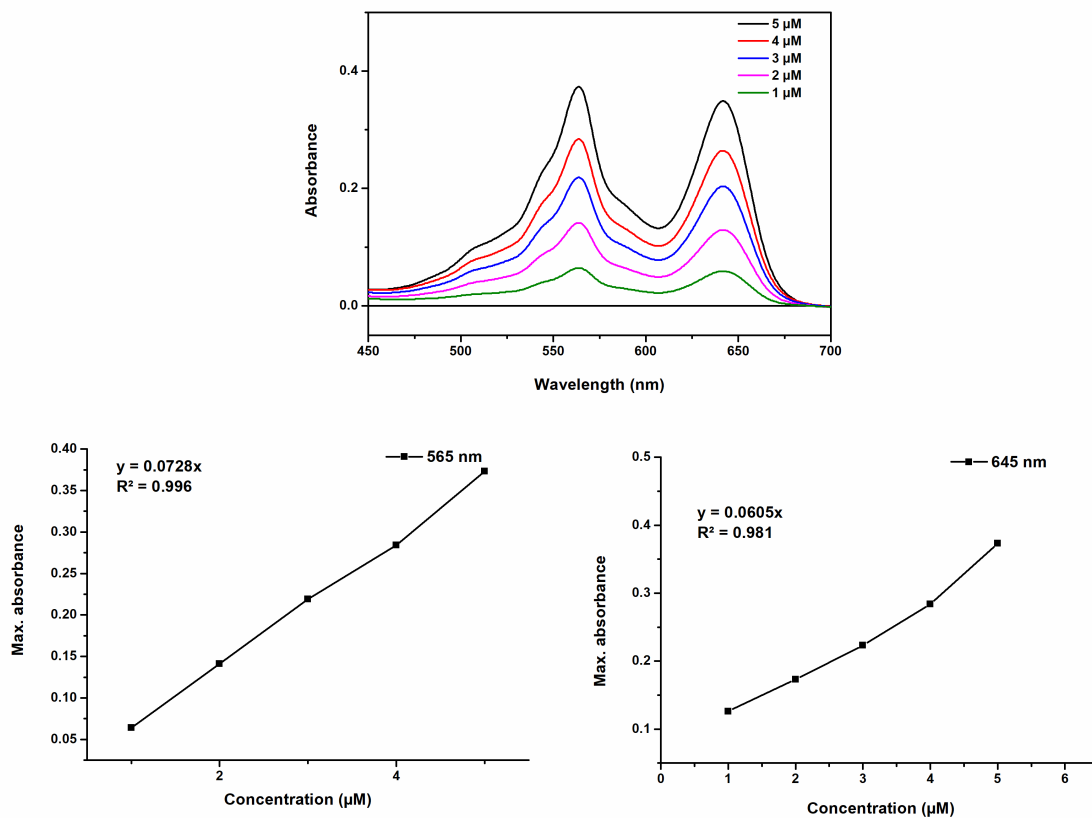

**Figure S13.** Absorbance spectrum of compound **5** in THF/Water (1:1) at different concentration

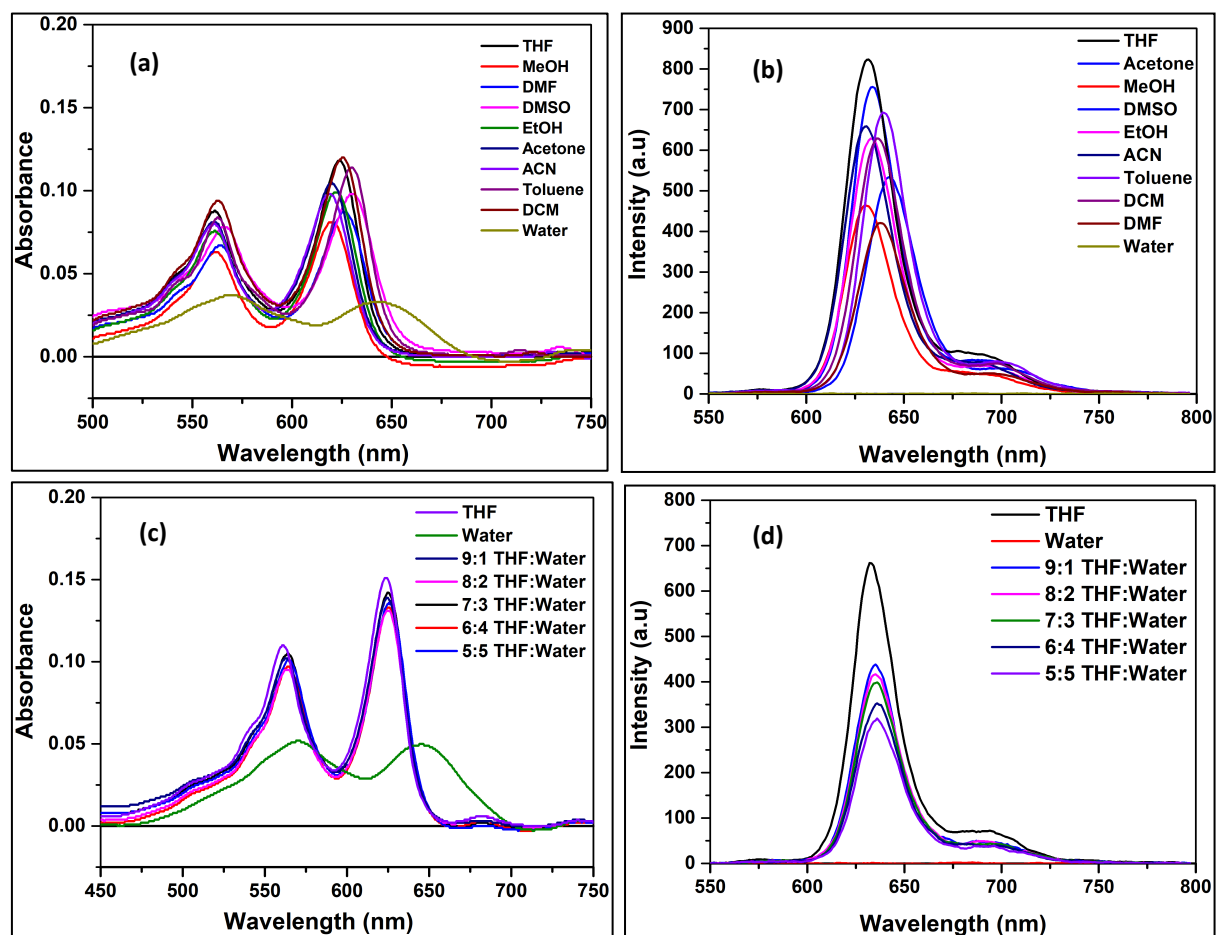

**Figure S14:** (a) Absorbance and (b) Fluorescence spectra of compound **5** in different solvents, (c) Absorbance and (d) Fluorescence spectra of compound **5** in different THF/water ratios (Ext. Wav. 510 nm, C= 1.0  $\mu$ M).

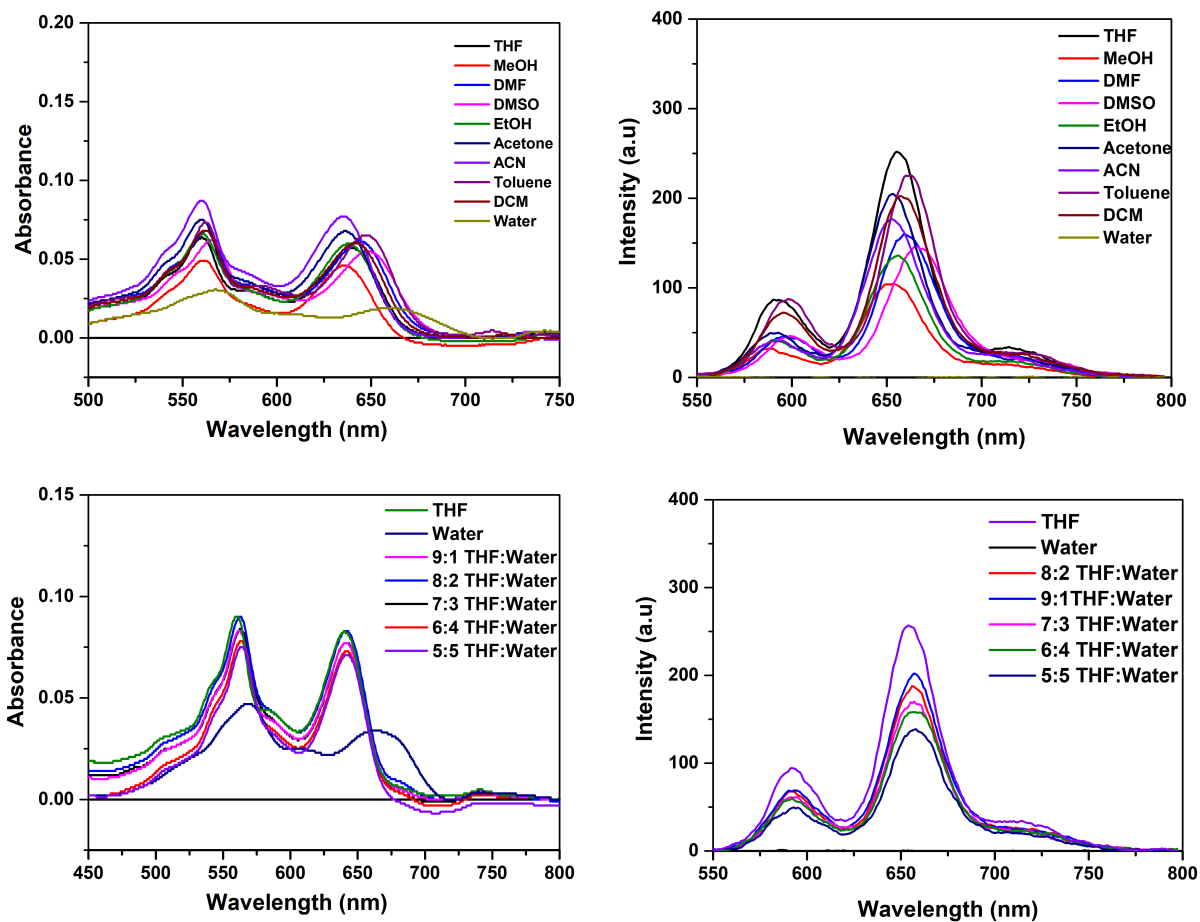

**Figure S15:** (a) Absorbance and (b) Fluorescence spectra of compound **6** in different solvents, (c) Absorbance and (d) Fluorescence spectra of compound **6** in different THF/Water ratios (Ext. Wav. 510 nm, C= 1.0  $\mu$ M).

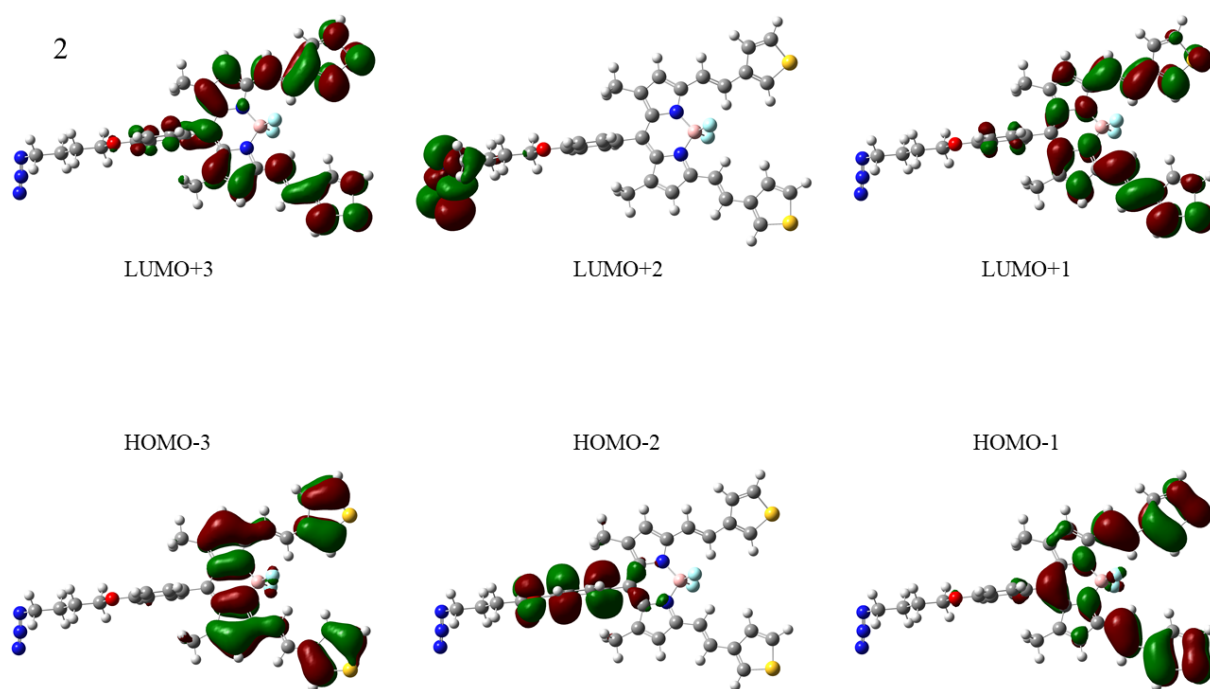

**Figure S16.** Frontier orbitals of compound 2

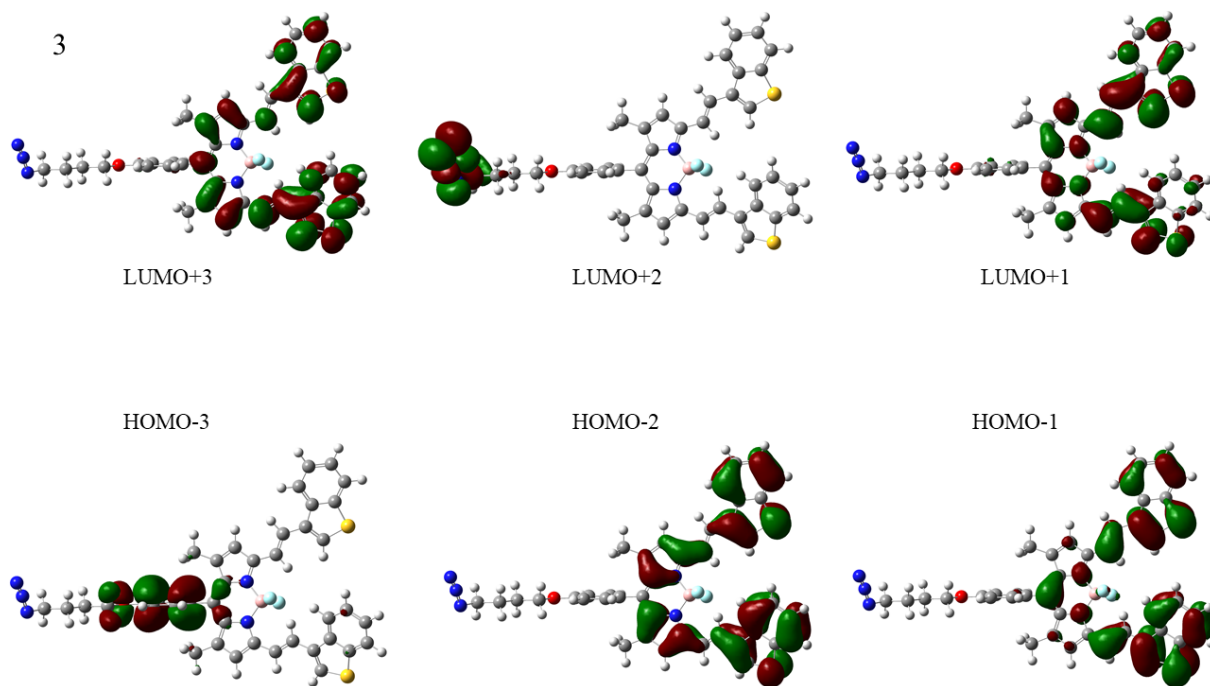

**Figure S17.** Frontier orbitals of compound 3

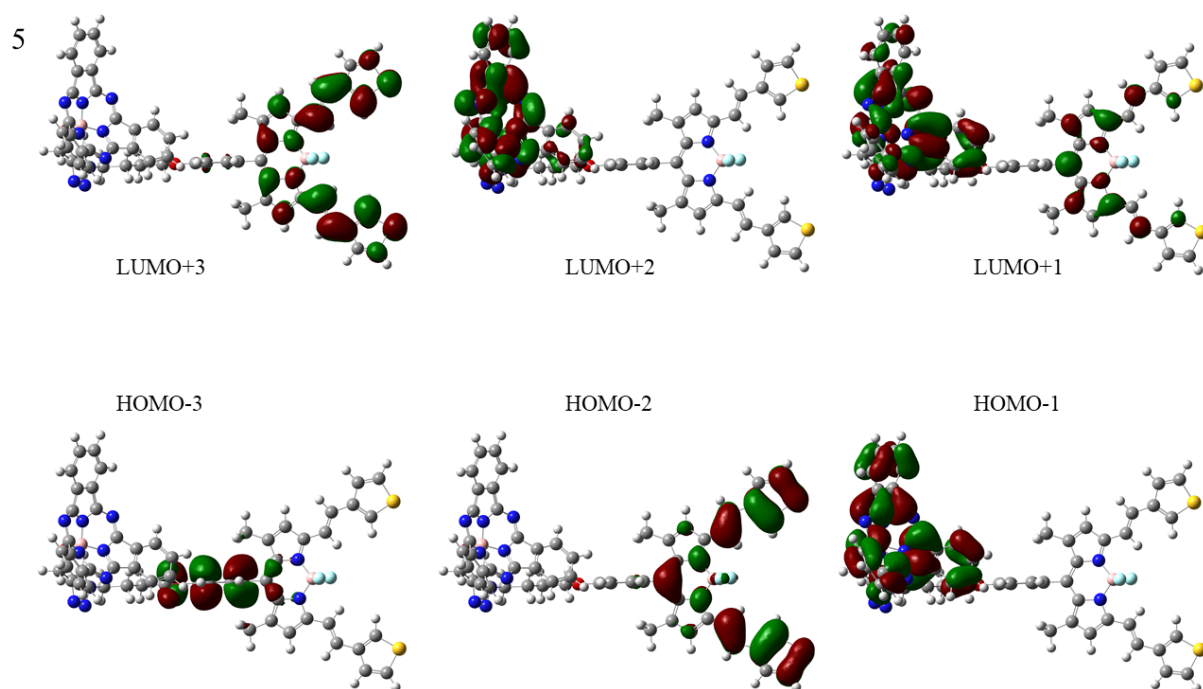

**Figure S18.** Frontier orbitals of compound 5

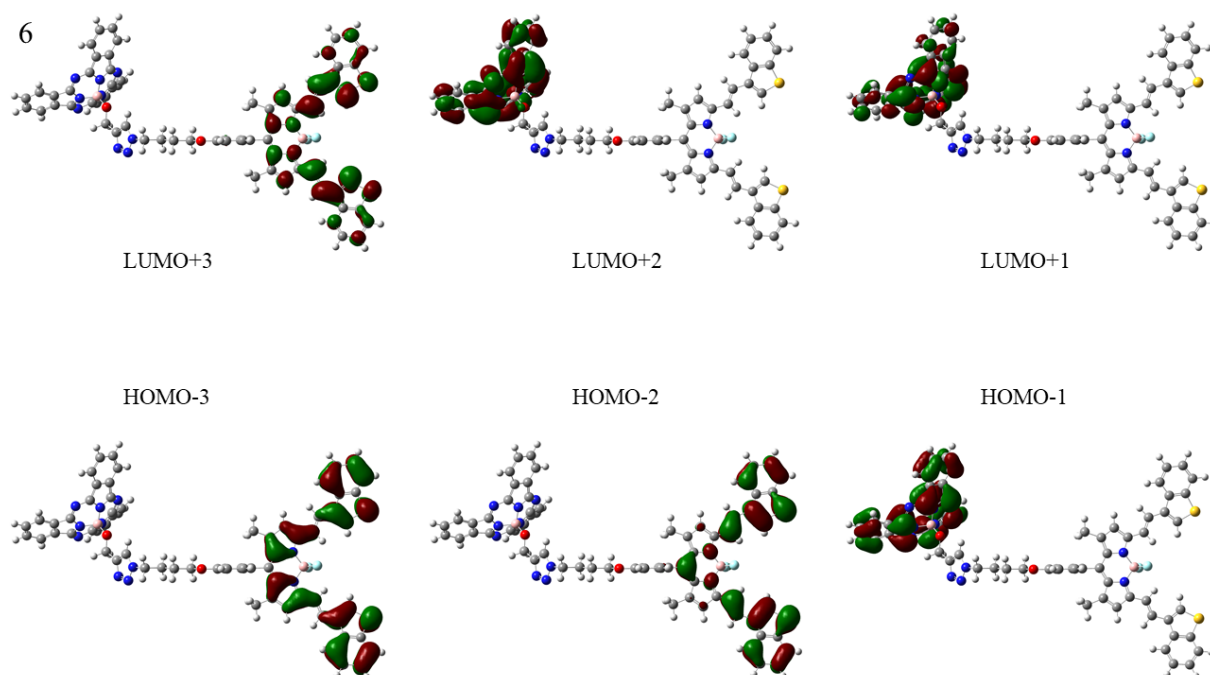

**Figure S19.** Frontier orbitals of compound 6
